# Supplementary material for: Comparative genomics of the pathogenic ciliate Ichthyophthirius multifiliis, its free-living relatives and a host species provide insights into adoption of a parasitic lifestyle and prospects for disease control
Source: PubMed Central journal article supplement (PMC3341644; doi:10.1186/gb-2011-12-10-r100), 2011-10-17

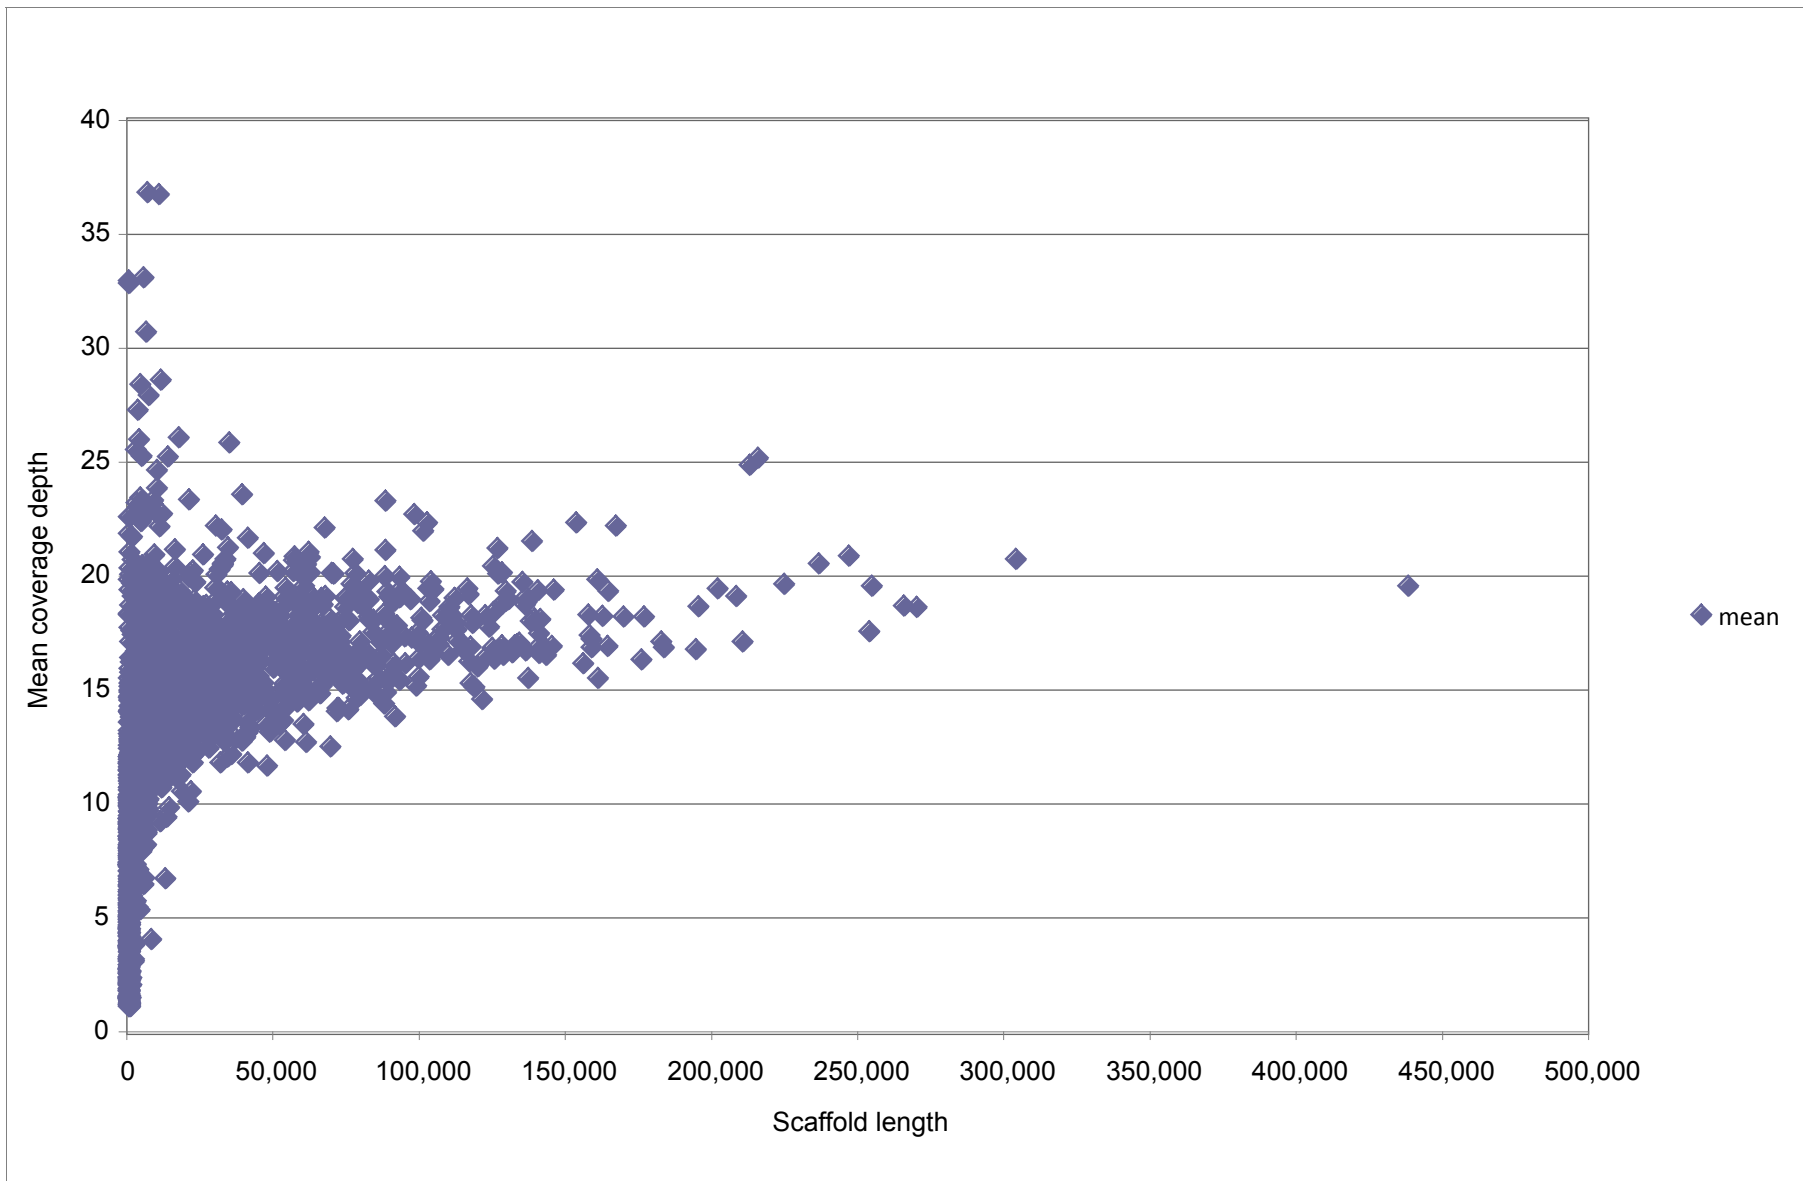

Supplement: gb-2011-12-10-r100-S2.pdf [file gb-2011-12-10-r100-S2.pdf]
